# Supplementary material
Source: PubMed Central journal article supplement (PMC4487225)
Supplement: sb500351f_si_001.pdf [file sb500351f_si_001.pdf]

## Supporting Information

# High-efficiency Multiplex Genome Editing of *Streptomyces* Species using an Engineered CRISPR/Cas System

Ryan E. Cobb,<sup>†, ‡</sup> Yajie Wang,<sup>†</sup> and Huimin Zhao<sup>†, ‡, §, \*</sup>

<sup>†</sup>Department of Chemical and Biomolecular Engineering, <sup>‡</sup>Institute for Genomic Biology,  
<sup>§</sup>Departments of Chemistry, Biochemistry and Bioengineering, Center for Biophysics and  
Computational Biology, University of Illinois at Urbana-Champaign, Urbana, IL 61801

### Table of Contents

|                                                                                                                                                                                                                                                                                                                                                             |   |
|-------------------------------------------------------------------------------------------------------------------------------------------------------------------------------------------------------------------------------------------------------------------------------------------------------------------------------------------------------------|---|
| <b>Detailed Plasmid Assembly Protocol</b> .....                                                                                                                                                                                                                                                                                                             | 2 |
| <b>Figure S1.</b> Phenotype of an <i>S. lividans redN</i> deletion strain. Edited strain (11) shows no production of the red pigment seen in the wild type strain (10) when grown on solid R2 medium. Obverse of plate is shown for clarity. ....                                                                                                           | 4 |
| <b>Figure S2.</b> Sequence alignment from six <i>S. lividans</i> exconjugants following targeting of <i>redN</i> .....                                                                                                                                                                                                                                      | 5 |
| <b>Figure S3.</b> Representative sequencing traces from genome-edited strains of <i>S. lividans</i> at the (a) <i>redN</i> or (b) <i>actVA-ORF5</i> locus, <i>S. viridochromogenes</i> at the (c) <i>phpD</i> or (d) <i>phpM</i> locus, and (e) <i>S. albus</i> at the <i>sshg_05713</i> locus. Dashed line indicates the site of the defined deletion..... | 6 |
| <b>Figure S4.</b> Diagnostic PCR results from lanthipeptide cluster deletion in three <i>S. albus</i> exconjugants using (a) primers 1 and 3, as shown in Figure 2a, and (b) primers 2 and 3, as shown in Figure 2a. ....                                                                                                                                   | 7 |
| <b>Table S1.</b> List of plasmids used in this study .....                                                                                                                                                                                                                                                                                                  | 8 |
| <b>Table S2.</b> List of primers used in this study .....                                                                                                                                                                                                                                                                                                   | 9 |

## Detailed Plasmid Assembly Protocol

All pCRISPOmyces plasmids were assembled using the following protocol:

- 1) Select a 20 nt protospacer of interest. The 3' protospacer adjacent sequence (PAM) must be NGG, where N is any nucleotide. Preference is given to:
  - a. sequences with purines occupying the last four (3') bases of the protospacer.
  - b. sequences on the non-coding strand.
  - c. sequences in which the last 12 nt of protospacer + 3 nt PAM (15 nt total) are unique in the genome (check by BLAST with all four possible NGG sequences).
- 2) Design two 24 nt oligonucleotides (4 nt 5' sticky end + 20 nt spacer sequence) with the sticky ends ACGC on the forward primer and AAAC on the reverse primer. For example, if the spacer sequence is CTCACGGACGGAGACCAGGA, then the two primers are:
  - a. Spacer-for: 5'-ACGCCTCACGGACGGAGACCAGGA-3'
  - b. Spacer-rev: 5'-AAACTCTGGTCTCCGTCCGTGAG-3'

Such that the annealed product will be:

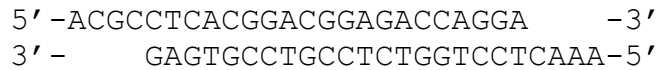

For plasmids with two guide RNA cassettes, design a synthetic construct with the following configuration:

*Bbs*I site-spacer1-sgRNABbsI site

Note that the sticky ends for the *Bbs*I sites (5' to 3') are ACGC and GTTT. Proceed to step 4.

- 3) For single spacers, anneal spacer oligos as follows:
  - a. Resuspend both oligos to 100  $\mu$ M in water
  - b. Mix 5  $\mu$ L FOR + 5  $\mu$ L REV + 90  $\mu$ L 30mM HEPES, pH 7.8
  - c. Heat to 95°C for 5min, then ramp to 4°C at 0.1°C/sec
- 4) Insert annealed spacer (or dual-spacer synthetic construct) by Golden Gate assembly.

Golden Gate reaction mixture:

|                        |             |                                              |
|------------------------|-------------|----------------------------------------------|
| Backbone               | X $\mu$ L   | 100 ng                                       |
| Insert                 | 0.3 $\mu$ L | From 10-fold diluted annealed oligo stock    |
| T4 Ligase Buffer (NEB) | 2 $\mu$ L   |                                              |
| T4 ligase (NEB)        | 1 $\mu$ L   | 400 U/ $\mu$ L stock is sufficient; add last |
| BbsI (NEB)             | 1 $\mu$ L   | Stored at -80 °C                             |
| H <sub>2</sub> O       | Y $\mu$ L   |                                              |
|                        | <hr/>       |                                              |
|                        | 20 $\mu$ L  |                                              |

Golden Gate Program: 37°C 10 min  
16°C 10 min  
Goto step 1, 9 times  
50°C, 5 min  
65°C, 20 min  
4°C, forever

- 5) Transform 3  $\mu$ L of each reaction to *E. coli* NEB5alpha by heat shock (manufacturer's protocol)
- 6) Plate 10% of recovery culture on selective plates with 10  $\mu$ L of 0.5 M IPTG and 40  $\mu$ L of 20mg/mL Bluo-gal (in DMSO).
- 7) Pick white colonies to selective LB and recover plasmid.

- 8) Meanwhile, PCR amplify 1 kb homology arms from genomic DNA of the strain of interest. Two options for primer design:
  - a. Design overlaps (20-30 nt) at both ends of both arms and directly perform 3-piece Gibson assembly (1 kb left arm + 1 kb right arm + digested plasmid).
  - b. Design overlaps (20-30 nt) at the junction of the two arms and *Xba*I cutsites at the opposite ends of the two arms. Then splice the two arms by overlap-extension PCR, and digest and ligate the 2 kb product into the digested plasmid.
- 9) Digest the spacer-containing plasmid (assembled in steps 1-7) with *Xba*I. Dephosphorylate with FastAP (Thermo) or similar to prevent re-ligation.
- 10) Perform the chosen assembly method to insert the 2 kb editing template in your digested, dephosphorylated plasmid.
- 11) Transform assembly product to NEB5alpha competent cells (or similar).
- 12) The next day, pick colonies to LB+apramycin.
- 13) Recover plasmids and confirm by digestion or sequencing.
- 14) Transform confirmed plasmid to an appropriate conjugation donor strain, and conjugate following standard protocol.

**Figure S1:** Phenotype of an *S. lividans redN* deletion strain. Edited strain (11) shows no production of the red pigment seen in the wild type strain (10) when grown on solid R2 medium. Obverse of plate is shown for clarity.

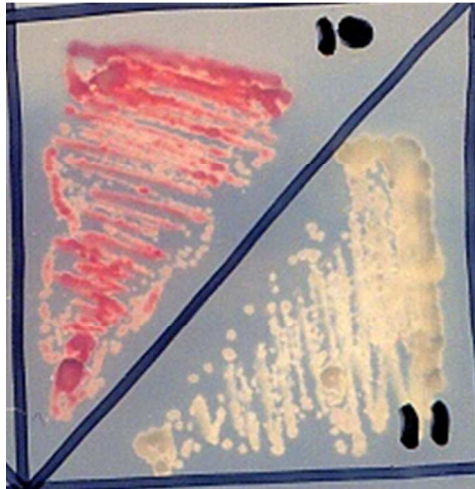

**Figure S2.** Sequence alignment from six *S. lividans* exconjugants following targeting of *redN*.

```
redN-locus GGACAGGCCGAAGTGCTCACGGACGGAGACCAGGACGGACTCCATGATGACGGAGTCGA
Excon#1    GGACAGGCCGAAGTGCTCAC::::::::::::::::::::TCCATGATGACGGAGTCGA
Excon#2    GGACAGGCCGAAGTGCTCAC::::::::::::::::::::TCCATGATGACGGAGTCGA
Excon#3    GGACAGGCCGAAGTGCTCAC::::::::::::::::::::TCCATGATGACGGAGTCGA
Excon#4    GGACAGGCCGAAGTGCTCAC::::::::::::::::::::TCCATGATGACGGAGTCGA
Excon#5    GGACAGGCCGAAGTGCTCAC::::::::::::::::::::TCCATGATGACGGAGTCGA
Excon#6    GGACAGGCCGAAGTGCTCAC::::::::::::::::::::TCCATGATGACGGAGTCGA
spacer+PAM          CTCACGGACGGAGACCAGGACGG
```

**Figure S3.** Representative sequencing traces from genome-edited strains of *S. lividans* at the (a) *redN* or (b) *actVA-ORF5* locus, *S. viridochromogenes* at the (c) *phpD* or (d) *phpM* locus, and (e) *S. albus* at the *sshg\_05713* locus. Dashed line indicates the site of the defined deletion.

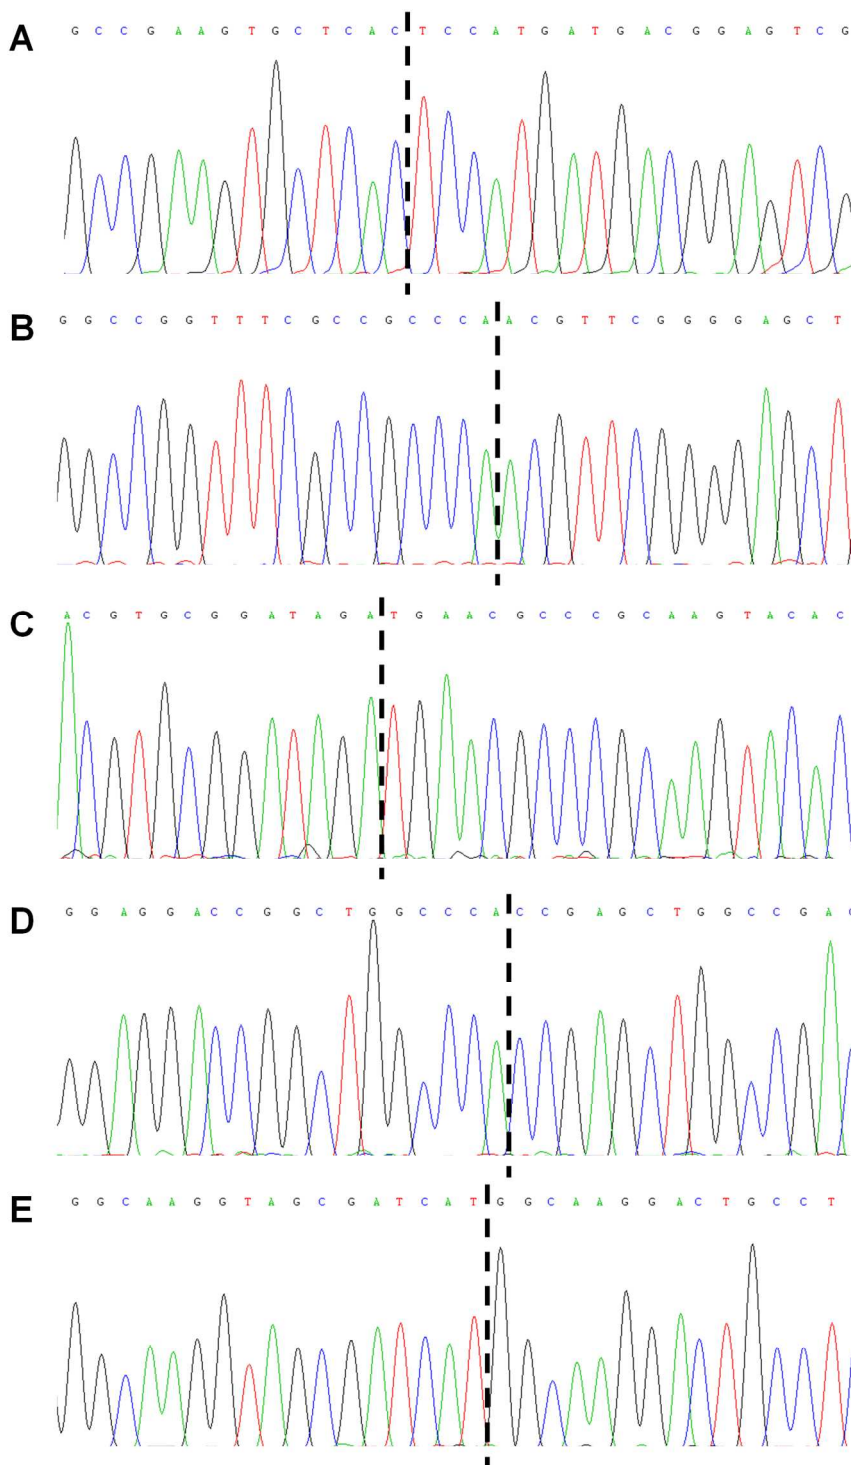

**Figure S4.** Diagnostic PCR results from lanthipeptide cluster deletion in three *S. albus* exconjugants using (a) primers 1 and 3, as shown in Figure 2a, and (b) primers 2 and 3, as shown in Figure 2a.

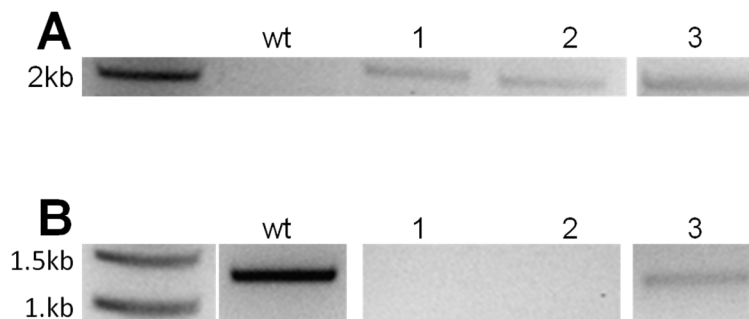

**Table S1.** List of plasmids used in this study

| Plasmid              | Description                                                                                                       | Source or Reference |
|----------------------|-------------------------------------------------------------------------------------------------------------------|---------------------|
| pJVD52.1             | <i>Apr<sup>R</sup>, oriT, rep<sup>pSG5(ts)</sup>, ori<sup>ColE1</sup></i>                                         | <sup>1</sup>        |
| pRS416               | CEN6/ARS4, <i>URA3</i>                                                                                            | Stratagene          |
| pUC57-Kan_sSpcas9    | <i>E. coli</i> cloning vector with codon-optimized <i>S. pyogenes cas9 (sSpcas9)</i>                              | GenScript           |
| pCRISPomyces-1       | <i>Apr<sup>R</sup>, oriT, rep<sup>pSG5(ts)</sup>, ori<sup>ColE1</sup>, sSpcas9</i> , tracrRNA, CRISPR array       | this study          |
| pCm1-redN-2k         | pCRISPomyces-1 with <i>redN</i> spacer and 2kb editing template                                                   | this study          |
| pCmEE-redN-2k        | pCm1-redN-2k with <i>sSpCas9</i> gene removed                                                                     | this study          |
| pCm1-aVA5-2k         | pCRISPomyces-1 with <i>actVA-ORF5</i> spacer and 2kb editing template                                             | this study          |
| pCRISPomyces-2       | <i>Apr<sup>R</sup>, oriT, rep<sup>pSG5(ts)</sup>, ori<sup>ColE1</sup>, sSpcas9</i> , synthetic guide RNA cassette | this study          |
| pCm2-redN-2k         | pCRISPomyces-2 with <i>redN</i> sgRNA and 2kb editing template                                                    | this study          |
| pCm2-aVA5-2k         | pCRISPomyces-2 with <i>actVA-ORF5</i> sgRNA and 2kb editing template                                              | this study          |
| pCm2-redN-2k-aVA5-2k | pCRISPomyces-2 with <i>redN</i> and <i>actVA-ORF5</i> sgRNAs and two 2kb editing templates                        | this study          |
| pCm2-redDF-2k        | pCRISPomyces-2 with <i>redD</i> and <i>redF</i> sgRNAs and one 2kb editing template                               | this study          |
| pCm2-phpD-2k         | pCRISPomyces-2 with <i>phpD</i> sgRNA and 2kb editing template                                                    | this study          |
| pCm2-phpM-2k         | pCRISPomyces-2 with <i>phpM</i> sgRNA and 2kb editing template                                                    | this study          |
| pCm2-5713-2k         | pCRISPomyces-2 with <i>sshg_05713</i> sgRNA and 2kb editing template                                              | this study          |
| pCm2-0040-0050-2k    | pCRISPomyces-2 with <i>sshg_00040</i> and <i>sshg_00050</i> sgRNAs and one 2kb editing template                   | this study          |

<sup>1</sup> Blodgett, J. A.; Thomas, P. M.; Li, G.; Velasquez, J. E.; van der Donk, W. A.; Kelleher, N. L.; Metcalf, W. W. (2007) Unusual transformations in the biosynthesis of the antibiotic phosphinothricin tripeptide. *Nat. Chem. Biol.* 3, 480-485.



**Table S2.** List of primers used in this study

| Strain/Category                               | Name                    | Sequence                                                   | Description                                                                        |
|-----------------------------------------------|-------------------------|------------------------------------------------------------|------------------------------------------------------------------------------------|
| <i>S. lividans</i><br>Plasmid<br>Construction | pCm-redN-CR-for         | ccaa aac<br>CTCACGGACGGAGACCAGGA gtttt                     | <i>redN</i> spacer for pCRISPomyces-1                                              |
|                                               | pCm-redN-CR-rev         | ctctaaaacTCCTGGTCTCCGTCCGTG<br>AGgtt                       | <i>redN</i> spacer for pCRISPomyces-1                                              |
|                                               | pCm-redN-1kL-for        | gggttttttg tctaga<br>CTCGGTGATCTTCGGTGACG                  | amplification of 1 kb <i>redN</i><br>homology arm - left                           |
|                                               | pCm-redN-1kL-rev        | CAGGCCGAAGTG<br>CTCACTCCATGATGACGGAGTCG                    | amplification of 1 kb <i>redN</i><br>homology arm - left                           |
|                                               | pCm-redN-1kR-for        | TCATGGAGTGAG<br>CACTTCGGCCTGTCCGCCGC                       | amplification of 1 kb <i>redN</i><br>homology arm - right                          |
|                                               | pCm-redN-1kR-rev        | gggatcc tctaga<br>AGATCTTGCGCACGGCG                        | amplification of 1 kb <i>redN</i><br>homology arm - right                          |
|                                               | pCm-actVA5-CR-<br>for   | ccaa aac<br>CGTGCGCCACCGGTACGAAG gtttt                     | <i>actVA-ORF5</i> spacer for<br>pCRISPomyces-1                                     |
|                                               | pCm-actVA5-CR-<br>rev   | ctctaaaacCTTCGTACCGGTGGCGCA<br>CGgtt                       | <i>actVA-ORF5</i> spacer for<br>pCRISPomyces-1                                     |
|                                               | pCm-actVA5-1kL-<br>for  | gagacat tctaga<br>GGTGCCACTGGAAAGCAAGGC                    | amplification of 1 kb <i>actVA-ORF5</i><br>homology arm - left                     |
|                                               | pCm-actVA5-1kL-<br>rev  | AGTCCCCGAACGTTGGCGGCGCA<br>AACCGGC                         | amplification of 1 kb <i>actVA-ORF5</i><br>homology arm - left                     |
|                                               | pCm-actVA5-1kR-<br>for  | GGTTTCGCGCCCA<br>ACGTTCCGGGAGCTGGTG                        | amplification of 1 kb <i>actVA-ORF5</i><br>homology arm - right                    |
|                                               | pCm-actVA5-1kR-<br>rev  | ttcaggc tctaga<br>GAAGGTGACGACCGCGACG                      | amplification of 1 kb <i>actVA-ORF5</i><br>homology arm - right                    |
|                                               | pCm2-redN-gRNA-<br>for  | acgc CTCACGGACGGAGACCAGGA                                  | <i>redN</i> spacer for pCRISPomyces-2<br>guide RNA                                 |
|                                               | pCm2-redN-gRNA-<br>rev  | aaac TCCTGGTCTCCGTCCGTGAG                                  | <i>redN</i> spacer for pCRISPomyces-2<br>guide RNA                                 |
|                                               | pCm2-aVA5-gRNA-<br>for  | acgc CGTGCGCCACCGGTACGAAG                                  | <i>actVA-ORF5</i> spacer for<br>pCRISPomyces-2 guide RNA                           |
|                                               | pCm2-aVA5-gRNA-<br>rev  | aaac CTTCTGACCGGTGGCGCACG                                  | <i>actVA-ORF5</i> spacer for<br>pCRISPomyces-2 guide RNA                           |
|                                               | pCm2-redN-2k-GA-<br>for | gctcggttgccgccggcgcttttta tctaga<br>CTCGGTGATCTTCGGTGACG   | amplification of 2 kb <i>redN</i> editing<br>template for Gibson Assembly          |
|                                               | pCm2-redN-2k-GA-<br>rev | CTTCCAGTGGCACC<br>AGATCTTGCGCACGGCG                        | amplification of 2 kb <i>redN</i> editing<br>template for Gibson Assembly          |
|                                               | pCm2-aVA5-2k-GA-<br>for | CCGTGCGCAAGATCT<br>GGTGCCACTGGAAAGCAAGGC                   | amplification of 2 kb <i>actVA-ORF5</i><br>editing template for Gibson<br>Assembly |
|                                               | pCm2-aVA5-2k-GA-<br>rev | gcaacgggcctttttacggttcttgccc<br>tctaga GAAGGTGACGACCGCGACG | amplification of 2 kb <i>actVA-ORF5</i><br>editing template for Gibson<br>Assembly |
|                                               | pCm-redD-1kL-for        | gagacat tctaga<br>TCGTGGTGCGCATCATGAC                      | amplification of 1 kb <i>red</i> cluster<br>homology arm - left                    |
|                                               | pCm-redD-1kL-rev        | AGGAAGACGAACATATGGGGTGCC<br>GGTCGC                         | amplification of 1 kb <i>red</i> cluster<br>homology arm - left                    |
|                                               | pCm-redF-1kR-for        | GCGACCGGCACCCCAT<br>ATGTTTCGTCTTCTGAACATCCCCAT             | amplification of 1 kb <i>red</i> cluster<br>homology arm - right                   |

|                          |                         |                                    |                                                                  |
|--------------------------|-------------------------|------------------------------------|------------------------------------------------------------------|
| PCR Screening            | pCm-redF-1kR-rev        | ttcaggc tctaga<br>ATCGGGATCAGGCCAG | amplification of 1 kb <i>red</i> cluster<br>homology arm - right |
|                          | Sliv-upstr-redN-for     | GCATCTCAACCCGCAGGAC                | amplification of <i>redN</i> locus from<br>genome                |
|                          | Sliv-dwstr-redN-rev     | CAGGTCGGCCATGTCGTTGTG              | amplification of <i>redN</i> locus from<br>genome                |
|                          | Sliv-upstr-aVA5-for     | CCGATGAGAACAAGCCCGTACTGG           | amplification of <i>actVA-ORF5</i> locus<br>from genome          |
|                          | Sliv-dwstr-aVA5-<br>rev | CCACCAGCTTGTGCTGGGTG               | amplification of <i>actVA-ORF5</i> locus<br>from genome          |
|                          | Sliv-upstr-redD-for     | CGGGACCCTTGCGAACG                  | amplification of <i>red</i> locus from<br>genome                 |
|                          | Sliv-dwstr-redF-rev     | CGAAGCGGATGGTCCACTTGG              | amplification of <i>red</i> locus from<br>genome                 |
|                          | Sliv-redF-inner-for     | ACATCAACTACTTCGGTGACGCC            | negative PCR check for <i>red</i> cluster<br>deletion            |
|                          | Sequencing              | Sliv-redN-PS-seq-<br>for           | CACTACCTGCAGGGCGAGTTCC                                           |
| Sliv-redN-PS-seq-<br>rev |                         | GGAGGTCAGGACGACCGAGTC              | sequencing of <i>redN</i> protospacer                            |
| Sliv-aVA5-PS-seq-<br>for |                         | CTCAACGGCATCGGCTATCACG             | sequencing of <i>actVA-ORF5</i><br>protospacer                   |
| Sliv-aVA5-PS-seq-<br>rev |                         | ATCCACGACGCTGACGAACG               | sequencing of <i>actVA-ORF5</i><br>protospacer                   |

*S. viridochromogenes*

|                         |                        |                                          |                                                           |                                                   |
|-------------------------|------------------------|------------------------------------------|-----------------------------------------------------------|---------------------------------------------------|
| Plasmid<br>Construction | pCm2-phpD-gRNA-<br>for | acgc TCCAGTGAGCGAGCTTGAAC                | <i>phpD</i> spacer for pCRISPomyces-2<br>guide RNA        |                                                   |
|                         | pCm2-phpD-gRNA-<br>rev | aaac GTTCAAGCTCGCTCACTGGA                | <i>phpD</i> spacer for pCRISPomyces-2<br>guide RNA        |                                                   |
|                         | pCm-phpD-1kL-for       | gagacat tctaga<br>TACTGTCATGGATGCGGCCAA  | amplification of 1 kb <i>phpD</i><br>homology arm - left  |                                                   |
|                         | pCm-phpD-1kL-rev       | ACTTGCGGGCGTTCA<br>TCTATCCGCACGTCTCTCC   | amplification of 1 kb <i>phpD</i><br>homology arm - left  |                                                   |
|                         | pCm-phpD-1kR-for       | AGACGTGCGGATAGA<br>TGAACGCCCGCAAGTACACG  | amplification of 1 kb <i>phpD</i><br>homology arm - right |                                                   |
|                         | pCm-phpD-1kR-rev       | ttcaggc tctaga<br>GGAAGCTGCCGACCAGGT     | amplification of 1 kb <i>phpD</i><br>homology arm - right |                                                   |
|                         | pCm2-phpM-<br>gRNA-for | acgc CGAGGCTGTGGGCGAAGGGG                | <i>phpM</i> spacer for pCRISPomyces-2<br>guide RNA        |                                                   |
|                         | pCm2-phpM-<br>gRNA-rev | aaac CCCCTTCGCCACAGCCTCG                 | <i>phpM</i> spacer for pCRISPomyces-2<br>guide RNA        |                                                   |
|                         | pCm-phpM-1kL-for       | gagacat tctaga<br>CGAGCGGTGACCGACTGG     | amplification of 1 kb <i>phpM</i><br>homology arm - left  |                                                   |
|                         | pCm-phpM-1kL-rev       | cgctggccagctcgg<br>TGGGCCAGCCGGTCTCTC    | amplification of 1 kb <i>phpM</i><br>homology arm - left  |                                                   |
|                         | pCm-phpM-1kR-for       | ggaccggctggccca<br>CCGAGCTGGCCGACGAC     | amplification of 1 kb <i>phpM</i><br>homology arm - right |                                                   |
|                         | pCm-phpM-1kR-<br>rev   | ttcaggc tctaga<br>GGACTCGACGAGAAAGCTGACC | amplification of 1 kb <i>phpM</i><br>homology arm - right |                                                   |
|                         | PCR Screening          | Svir-upstr-phpD-for                      | GACGTGGCGGTGCGGATC                                        | amplification of <i>phpD</i> locus from<br>genome |

|            |                      |                       |                                                |
|------------|----------------------|-----------------------|------------------------------------------------|
| Sequencing | Svir-dwstr-phpD-rev  | CTCGGCGTGGTCGATCAGG   | amplification of <i>phpD</i> locus from genome |
|            | Svir-upstr-phpM-for  | ACGTCTGGCACTGGTACCAC  | amplification of <i>phpM</i> locus from genome |
|            | Svir-dwstr-phpM-rev  | ACTGGAAGCTGCCGAAGAACG | amplification of <i>phpM</i> locus from genome |
|            | Svir-phpD-PS-seq-for | GCGTGGAGCGCTTCATCAC   | sequencing of <i>phpD</i> protospacer          |
|            | Svir-phpD-PS-seq-rev | CCGGTTCGTTGCTCGTC     | sequencing of <i>phpD</i> protospacer          |
|            | Svir-phpM-PS-seq-for | GGCCGATCCGGAGCAGTG    | sequencing of <i>phpM</i> protospacer          |
|            | Svir-phpM-PS-seq-rev | CGTCGGAGAGCAGGTGCAG   | sequencing of <i>phpM</i> protospacer          |

*S. albus*  
Plasmid  
Construction

|                     |                     |                                                                      |                                                                                 |
|---------------------|---------------------|----------------------------------------------------------------------|---------------------------------------------------------------------------------|
| PCR Screening       | pCm2-5713-gRNA-for  | acgc GCTGAGCAGGTTCCGCCAGA                                            | <i>sshg_05713</i> spacer for pCRISPomyces-2 guide RNA                           |
|                     | pCm2-5713-gRNA-rev  | aaac TCTGGCGGAACCTGCTCAGC                                            | <i>sshg_05713</i> spacer for pCRISPomyces-2 guide RNA                           |
|                     | pCm-5713-1kL-for    | gagacat tctaga<br>TCTTGATGAGCCCGGCGAT                                | amplification of 1 kb <i>sshg_05713</i> homology arm - left                     |
|                     | pCm-5713-1kL-rev    | CAAGGTAGCGATCAT<br>GGCAAGGACTGCCTCAC                                 | amplification of 1 kb <i>sshg_05713</i> homology arm - left                     |
|                     | pCm-5713-1kR-for    | GAGGCAGTCCTTGCC<br>ATGATCGCTACCTTGCCCGT                              | amplification of 1 kb <i>sshg_05713</i> homology arm - right                    |
|                     | pCm-5713-1kR-rev    | ttcaggc tctaga<br>TACCCGCTGCTCCTGGC                                  | amplification of 1 kb <i>sshg_05713</i> homology arm - right                    |
|                     | pCm-0040-1kL-for    | gagacat tctaga<br>GGTCGACGGTGTGCTGGTTG                               | amplification of 1 kb <i>sshg_00040-sshg_00050</i> cluster homology arm - left  |
|                     | pCm-0040-1kL-rev    | TCGCCGCTCCGTGC<br>CGGCTTCGGCGTGCCGTC                                 | amplification of 1 kb <i>sshg_00040-sshg_00050</i> cluster homology arm - left  |
|                     | pCm-0050-1kR-for    | GGCACGCCGAAGCCG<br>GCACGGAGGCGGCGAGG                                 | amplification of 1 kb <i>sshg_00040-sshg_00050</i> cluster homology arm - right |
|                     | pCm-0050-1kR-rev    | ttcaggc tctaga<br>GCGTGAGGTGTAGACGATCTCGG                            | amplification of 1 kb <i>sshg_00040-sshg_00050</i> cluster homology arm - right |
|                     | Salb-upstr-5713-for | TCCC GTTGTGGATCACTGG                                                 | amplification of <i>sshg_05713</i> locus from genome                            |
|                     | Salb-dwstr-5713-rev | ACGGTGTGCGAGGTTGATGTGG                                               | amplification of <i>sshg_05713</i> locus from genome                            |
|                     | Salb-upstr-0040-for | GATGTGGCCGAGGCGCAG                                                   | amplification of <i>sshg_00040-sshg_00050</i> locus from genome                 |
|                     | Salb-dwstr-0050-rev | GCGGACATTCCGAACAGCC                                                  | amplification of <i>sshg_00040-sshg_00050</i> locus from genome                 |
| Salb-4050-inner-for | ATGTCGCAGGCAGGAACGG | negative PCR check for <i>sshg_00040-sshg_00050</i> cluster deletion |                                                                                 |

## Sequencing

|                      |                      |                                             |
|----------------------|----------------------|---------------------------------------------|
| Salb-5713-PS-seq-for | TCGCCAGTCTGCTCCATCC  | sequencing of <i>sshg_05713</i> protospacer |
| Salb-5713-PS-seq-rev | CCACCTCCAGCAGTTTGCG  | sequencing of <i>sshg_05713</i> protospacer |
| Salb-0040-PS-seq-for | CGTACCGCAGGAGCTTCACG | sequencing of <i>sshg_00040</i> protospacer |
| Salb-0050-PS-seq-rev | GACGCCCTGGCTGATGTCC  | sequencing of <i>sshg_00050</i> protospacer |
